# Stressor interactions at the community level: explaining qualitative mismatches between observations

James A. Orr<sup>1</sup>, Jeremy J. Piggott<sup>2</sup>, Andrew L. Jackson<sup>2</sup>,  
Michelle C. Jackson<sup>1</sup> and Jean-François Arnoldi<sup>3</sup>

1. Department of Zoology, University of Oxford, Oxford, UK.

2. Zoology Department, School of Natural Sciences, Trinity College Dublin, Dublin, Ireland.

3. Centre National de la Recherche Scientifique, Experimental and Theoretical Ecology Station, Moulis, France.

**Article Type:** Letter

**Running Title:** Stressor interactions at the community level

**Keywords:** Multiple Stressors, Non-Additivity, Antagonism, Synergism, Community Metrics, Richness, Hill Diversity, Multi-functionality

**Abstract word count:** 141

**Main text word count:** 3608

**Number of figures:** 4

**Number of tables:** 0

**Number of text boxes:** 2

**Number of references:** 33

**Statement of authorship:** JAO and JFA developed the theory and wrote the first draft of the manuscript. JAO carried out the simulations and produced the figures. JAO analysed the empirical data with support from MCJ. All authors contributed to the ideas and the final manuscript.

**Data accessibility statement:** Empirical data and code used for simulations are available at <https://github.com/jamesaorr/observation-stressor-interactions>

**Emails:** James Orr: [james.orr@zoo.ox.ac.uk](mailto:james.orr@zoo.ox.ac.uk), Jeremy Piggott: [jeremy.piggott@tcd.ie](mailto:jeremy.piggott@tcd.ie), Andrew Jackson: [jackson@tcd.ie](mailto:jackson@tcd.ie), Michelle Jackson: [michelle.jackson@zoo.ox.ac.uk](mailto:michelle.jackson@zoo.ox.ac.uk), Jean-François Arnoldi: [jean-francois.arnoldi@sete.cnrs.fr](mailto:jean-francois.arnoldi@sete.cnrs.fr)

**Correspondence:** James Orr, Zoology Research and Administration Building, 11a Mansfield Road, Oxford, UK

## Abstract

1 Understanding the ecological impacts of global change forces us to consider the antagonistic and  
2 synergistic interactions between the multiple stressors that ecosystems may face. At the community-  
3 level, such interactions are quantified based on the responses of various ecosystem-functioning or  
4 diversity metrics. Worryingly, in empirical data, we find that community metrics often observe  
5 *opposite* interactions between the same two stressors - sometimes even *systematically*. Here, we  
6 investigate this puzzling pattern via a series of geometrical abstractions. By representing stressors  
7 and their interactions as displacement vectors in community state-space, and community metrics as  
8 directions in this space, we show that the angle between two directions determines the probability,  
9 over random stressor combinations, that the metrics will observe opposite interactions. We find  
10 that diversity and functioning can easily be associated to opposing directions, which explains the  
11 systematic mismatches seen in empirical data.

## 12 **1 Introduction**

13 Predicting the combined effects of multiple stressors on ecological communities is a difficult task.  
14 The crux of the problem is that stressors often interact in complex ways resulting in unexpected  
15 non-additive effects (Côté, Darling, & Brown, 2016; Kroeker, Kordas, & Harley, 2017). Thousands  
16 of studies have reported non-additive interactions (antagonistic or synergistic) between specific  
17 combinations of stressors on specific biological responses (Jackson, Loewen, Vinebrooke, & Chimimba,  
18 2016; Darling & Côté, 2008; Crain, Kroeker, & Halpern, 2008; Yue et al., 2017), showcasing a huge  
19 amount of context-dependency, and highlighting the need, and difficulty, to develop general theory on  
20 multiple stressor interactions (Schäfer & Piggott, 2018; De Laender, 2018). Furthermore, although  
21 chemists, biologists and ecotoxicologists can sometimes gather detailed knowledge of the mechanisms  
22 of stressor interactions at the individual and population levels (Boyd & Brown, 2015; Didham,  
23 Tylianakis, Gemmill, Rand, & Ewers, 2007; Rillig, Lehmann, Orr, & Waldman, 2021), research into  
24 stressor interactions at the community level is underdeveloped (Orr et al., 2020). Some progress  
25 has been made, for example towards understanding the role of species co-tolerance (Vinebrooke  
26 et al., 2004; MacLennan & Vinebrooke, 2021) and species interactions (Thompson, MacLennan,  
27 & Vinebrooke, 2018; Beauchesne, Cazelles, Archambault, Dee, & Gravel, 2021), but fundamental  
28 knowledge gaps remain.

29 Here we ask a basic, but crucial question: how much does the interaction between stressors depend on  
30 the way community-level responses are observed and quantified? To clarify the problem, consider a  
31 scenario where an ecologist studies the interactive effects of two stressors on an ecological community  
32 (Fig. 1A), using experimental data of the responses to the stressors individually and in combination  
33 (Fig. 1B). Suppose they quantify the interaction between those stressors based on the observed  
34 responses of species richness and total biomass (Fig. 1C). For species richness they find a synergistic  
35 interaction (the combination of stressors caused more extinctions than expected), but for total  
36 biomass they find an antagonistic interaction (the combination of stressors caused less change in  
37 total biomass than expected). It is concerning that the ecologist's conclusion about whether the  
38 stressors interact antagonistically or synergistically depends on how they chose to observe the effects  
39 of the stressors on the community.

40 Different community metrics observing opposite stressor interactions is not a hypothetical problem.  
41 In empirical studies of stressor interactions, community metrics often observe qualitatively different  
42 stressor interactions (Box 1, Fig. 2). In fact, when function (i.e. biomass) and diversity are both  
43 used to quantify stressor interactions, the meta-analysis reported in Box 1 reveals a systematic bias:  
44 roughly 75% of observations of interactions are qualitatively different (Box 1, Fig. 2A).

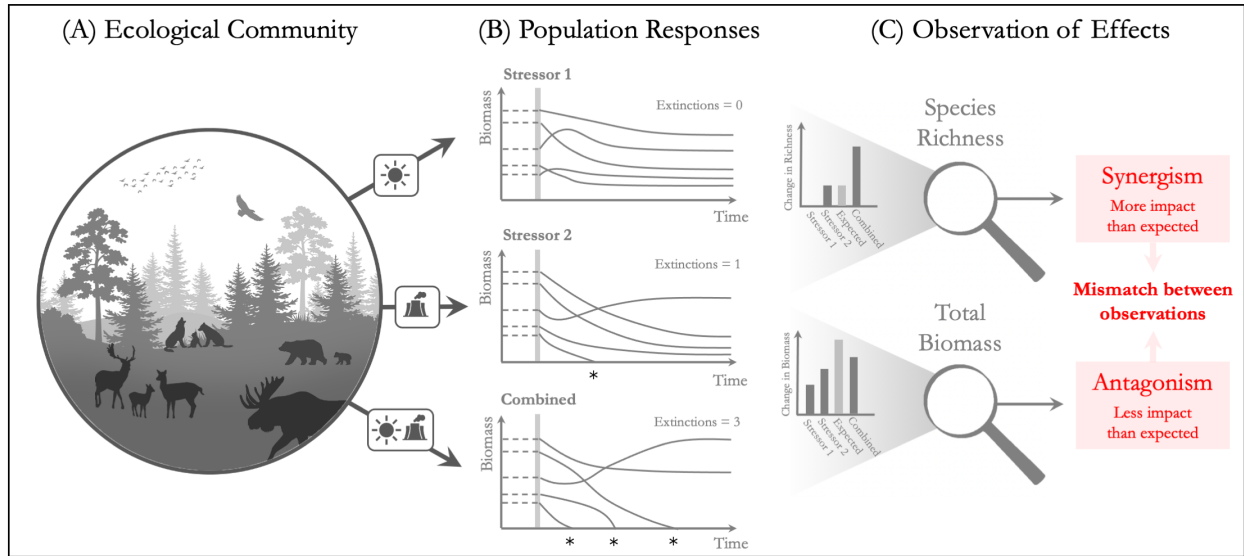

Figure 1: **(A)** An ecological community is impacted by two stressors individually and combined (i.e., a factorial study design). **(B)** Population-level responses are shown by timeseries of biomass where each curve is a single species. The dashed lines represent equilibrium biomasses, the vertical grey bars represent the onset of the (press) stressors and asterisks indicate extinctions. **(C)** The impact of the stressors is observed at the community level using changes in species richness and changes in total biomass. The interaction between the two stressors is quantified using an additive null model (i.e., the combined effect of stressors is predicted to be the sum of the individual effects). Species richness observes a synergistic interaction between the two stressors – there are more extinctions than predicted. Conversely, total biomass observes an antagonistic interaction between the two stressors – there was less change in total biomass than predicted.

45 Motivated by the concerning empirical patterns reported in Box 1, our goal here is to develop a  
 46 general theory capable of explaining why community metrics often observe qualitatively different  
 47 stressor interactions. Our theoretical construction strives to be simple enough to have a chance  
 48 to be generally applicable to multiple-stressor research, yet complex enough to be informative.  
 49 Specifically, we convert this ecological problem into a geometric one by representing stressors and  
 50 their interactions as displacement vectors and community metrics as directions in community state-  
 51 space. We find that the central ingredient is the co-linearity of observations, which we show can predict  
 52 the probability of mismatches. Furthermore, we uncover an intriguing link between mismatches at  
 53 the community level and useful population-level information. Based on our theoretical results we  
 54 give some recommendations for empiricists interested in multiple-stressor interactions but we also  
 55 discuss how our approach of comparing observations at the community level to gain insights about  
 56 the underlying system can be applied more broadly in ecology.

### Box 1: Synthesis of empirical data

To determine how common it is for community metrics to observe opposite stressor interactions, we analysed a database of multiple-stressor experiments in freshwater systems collected for meta-analyses by Jackson et al. (2016) and Morris et al. (2022). 59 of the 125 studies in the database quantified stressor interactions at the community level. There were 16 cases where stressor interactions were reported for both biomass and diversity (Table S1). There were also 12 cases where stressor interactions were reported for both biomass and decomposition (Table S2). Interactive effects between stressors were quantified using Hedges'  $d$  (Hedges, 1981). Annotated code for analysis of the empirical data is available in an R notebook at <https://github.com/jamesaorr/observation-stressor-interactions>.

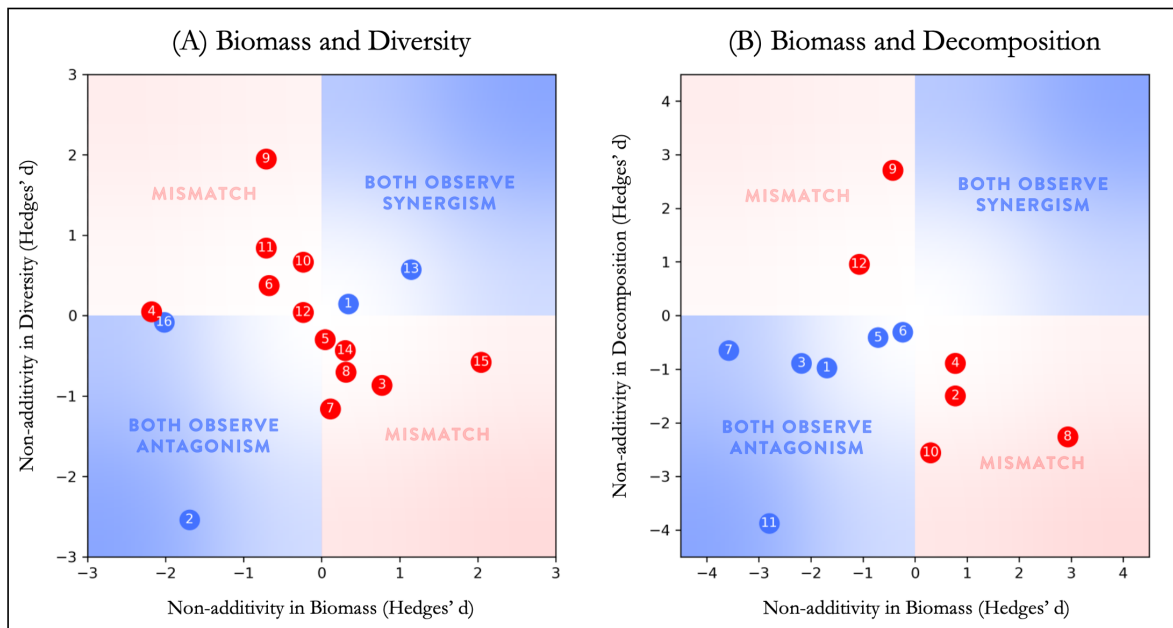

Figure 2. Empirical results where two community metrics were used to observe the interactive effects of the same two stressors on the same community. Both axes show Hedges'  $d$  for interactive effects where positive values indicate synergism and negative values indicate antagonism. When points fall in the blue quadrants both community metrics observe the same type of stressor interactions (synergism in the top right and antagonism in the bottom left). However, when points fall in the red quadrants there is a mismatch in the stressor interactions observed. **(A)** Cases where stressors interactions were quantified using a metric describing the biomass of a community and a metric describing the diversity of that same community. **(B)** Cases where stressor interactions were quantified using measures of both biomass and decomposition. See tables S1 and S2 for further details about each data point.

## 57 2 Methods

58 To understand why community metrics often observe opposite stressor interactions, we transform  
59 this ecological puzzle into a relatively simple geometric one by making a number of abstractions,

60 which are described more formally in Box 2.

61 First, we consider the effects of stressors on populations as displacement vectors in state-space  
62 representations of ecosystems where axes report the species' biomasses (Fig. 3A). Stressor interactions,  
63 or non-additivity, can be depicted in these state-spaces by plotting the initial state of the community,  
64 the state of the community following exposure to the stressors individually, the predicted state of the  
65 community following exposure to both stressors (based on additivity), and the realised state of the  
66 community following exposure to both stressors. The vector of differences between predicted and  
67 realised states encodes the non-additivity at the species level, also seen as a displacement vector.

68 The second level of abstraction is to consider ecosystem functions as positive directions in state-space  
69 (Fig. 3B). Total biomass for example is the sum of all the species' biomass and its direction lies exactly  
70 between all the axes, giving equal weight to all species. Other functions may not be influenced by the  
71 biomass of all species equally. In the hypothetical example shown in Fig. 3B, general decomposition is  
72 slightly more sensitive to the biomass of fungi than to the biomass of bacteria, plastic decomposition  
73 is primarily carried out by bacteria, and chemical production is primarily carried out by fungi. In  
74 general, a positive direction is spanned by a vector of positive values representing the per-capita  
75 contribution of each species to the function of interest. The "broadest" function, total biomass, is  
76 made up entirely of ones. The "narrowest" functions, are made up entirely of zeroes, except on the  
77 entry associated to the only species contributing to the function (Rivett & Bell, 2018).

78 Next, we combine these two levels of abstraction to propose a useful representation of the way  
79 functions observe non-additivity. To do so, we recenter the state space so that the axes now represent  
80 the non-additive effect on each species, with the origin consequently being the predicted state of the  
81 community following exposure to both stressors if they did not interact (Fig. 3C). Projecting the  
82 non-additivity displacement vector (multi-dimensional) onto the direction of an ecosystem function  
83 (one dimension) gives the non-additivity "observed" by that function, which is equivalent to measuring  
84 non-additivity as

$$\Delta f(N_{12}) - (\Delta f(N_1) + \Delta f(N_2)) \quad (1)$$

85 where  $\Delta f(N_k)$  refers to the change in a function caused by stressor  $k$ . Positive and negative values  
86 of non-additivity therefore reflect synergistic and antagonistic interactions respectively.

87 For each function, drawing a line through the origin and perpendicular to the direction of the function  
88 delineates two zones. One where the projection is negative, and thus the function observes an  
89 antagonistic interaction (negative non-additivity, less impact than predicted) and the other where the  
90 projection is positive and thus the function observes a synergistic interaction (positive non-additivity,  
91 more impact than predicted). If the two directions associated to the two functions are not perfectly  
92 co-linear, there will be zones of state-space where non-additivity will be qualitatively different when  
93 observed by one function or the other. These zones are the two symmetrical cones centered on the  
94 origin, formed by the the delineation lines of the functions, perpendicular to their respective directions  
95 (red zones in Fig. 3D). The larger the angle between two functions, the larger the zones of mismatches.

96 Consequently, if species' non additive responses were random and unbiased, the probability of finding  
97 a qualitative mismatch between the two measurement of community-level non-additivity would be:

$$\mathbb{P}(\text{Mismatch}) = \frac{\theta}{\pi} \quad (2)$$

98 where  $\theta$  is the angle between the two functions measured in radians. As the exact species contributions  
99 to a function may be challenging to acquire in empirical data, it is noteworthy that the angle between  
100 two functions can be approximated using only the knowledge, or estimation, of their respective  
101 broadness (Eq. (9) in Box 2). Indeed, in a community of  $S$  species and functions  $F_1$  and  $F_2$ :

$$\cos \theta \approx \cos \theta_{div} = \sqrt{{}^2D(F_1)/S \times {}^2D(F_2)/S} \quad (3)$$

102 where  $1/S \leq {}^2D(F)/S \leq 1$  is the broadness of the function  $F$ , defined here as the Gini-Simpson  
103 diversity index (Hill, 1973) of the vector of species contributions to the function, and normalized by  
104 species richness  $S$ . Expression (3) quantifies the intuitive expectation that two broad functions ought  
105 to be highly colinear, whereas two narrow functions can be independent (i.e. orthogonal to one  
106 another) if they are not performed by the same set of species.

107 Our final level of abstraction is the realization that measures of diversity, which are highly non-linear  
108 functions of species biomass (in the mathematical sense of a function of variables, not in the sense  
109 of ecological functioning), can still be placed into this geometric setting by considering their (state-  
110 dependent) gradients. The gradient of a diversity metric is a vector encoding its sensitivities to small  
111 variations in each species biomass. Importantly, gradients of diversity metrics span non-positive  
112 directions in state-space because increasing the biomass of some species (the more abundant ones)  
113 decreases diversity.

114 We carried out basic simulations to compare the observations between and within ecosystem functions  
115 of varying broadness and diversity metrics from the family of Hill diversity indices encompassing  
116 species richness ( $q = 0$ ), the Shannon index ( $q = 1$ ) and the Gini-Simpson index ( $q = 2$ ) (Roswell,  
117 Dushoff, & Winfree, 2021; Hill, 1973). For each pair of community metrics we performed many *in*  
118 *silico* multiple-stressor experiments and recorded the proportion of mismatches of observations of  
119 stressor interactions at the community level. Given the generality of our theory, these simulations only  
120 need to generate vectors describing non-additivity at the population level, which we can then observed  
121 at the community level, and are therefore not required to be highly realistic. We also recorded  
122 two pieces of information about the non-additivity at the population level: (i) the consistency of  
123 non-additivity (whether or not most species observe antagonistic or synergistic response) and (ii) the  
124 scaling of non-additivity by the biomass of species (whether or not more abundant species have larger  
125 non-additive responses). Annotated code for our simulations is available in a Jupyter Notebook at  
126 <https://github.com/jamesaorr/observation-stressor-interactions>.

## Box 2: Geometrical theory of stressor interactions at the community-level

Here bold symbols denote  $S$ -dimensional vectors, where  $S$  is the richness of the community. Let  $\mathbf{N}_0$  be the initial state of a community: the vector of species biomass prior to stressor exposure. Let  $\mathbf{N}_1$  and  $\mathbf{N}_2$  be the community states after exposure to stressor 1 and 2, respectively. Let  $\mathbf{N}_{12}$  be the state following exposure to both stressors. The observed-non additive response, quantified via an ecosystem function  $f(\mathbf{N})$ , is

$$\Delta f = f(\mathbf{N}_1) + f(\mathbf{N}_2) - f(\mathbf{N}_{12}) - f(\mathbf{N}_0). \quad (4)$$

The interaction type –antagonistic or synergistic– is determined by the sign of  $\Delta f$ . If positive, more change occurred than expected, thus a synergistic interaction. If negative, less change occurred, thus an antagonistic interaction took place between the two stressors. For a linear function there exist a constant  $c$  (that will play no role in what follows) and a vector  $\boldsymbol{\varphi}$  –the gradient– such that

$$f(\mathbf{N}) = c + \langle \boldsymbol{\varphi}, \mathbf{N} \rangle \quad (5)$$

with  $\langle \cdot, \cdot \rangle$  the scalar product of vectors. The elements of the gradient vector  $\boldsymbol{\varphi}$  encode the per capita contribution of species to the function. For us it will not matter what those exact contributions are, only relative species contributions which determine the *direction* spanned by the vector  $\boldsymbol{\varphi}$ . A positive function is such that the elements of the gradient are positive. If we rewrite the non additive response of the function, we get that

$$\Delta f = \langle \boldsymbol{\varphi}, \Delta \mathbf{N} \rangle \quad (6)$$

where  $\Delta \mathbf{N} = \mathbf{N}_1 + \mathbf{N}_2 - \mathbf{N}_{12} - \mathbf{N}_0$  is the vector of species-level non additivity. For non-linear functions the (state dependent) gradient vector can be computed as  $\varphi_i(\mathbf{N}_0) = \frac{\partial f}{\partial N_i} |_{\mathbf{N}_0}$ . In this case, expression (6) will be an approximation, exact only for weak stressors. Now, for two functions,  $f$ ,  $g$  associated to two directions spanned by the two gradient vectors  $\boldsymbol{\varphi}$  and  $\boldsymbol{\phi}$ , we define their colinearity as the angle  $0 \leq \theta < 2\pi$  whose cosine is

$$\cos \theta = \frac{\langle \boldsymbol{\varphi}, \boldsymbol{\phi} \rangle}{\|\boldsymbol{\varphi}\| \|\boldsymbol{\phi}\|} \quad (7)$$

where  $\|\cdot\|$  denotes the Euclidian norm of vectors. A graphical argument (Fig. 3D) tells us that the fraction of non-additive vectors  $\Delta \mathbf{N}$  that will lead to a qualitative interaction mismatch between the observations of  $f$  and  $g$  is

$$\mathbb{P}(\text{sign}(\Delta f) \neq \text{sign}(\Delta g)) = \frac{\theta}{\pi} \quad (8)$$

In such cases, one of the functions will observe a synergistic interaction between stressors, while the other function will observe an antagonistic interaction. For random positive directions, we can evaluate the cosine of the angle based on a notion of functional broadness. Indeed, given a random choice of positive functions

$$\frac{\langle \boldsymbol{\varphi}, \boldsymbol{\phi} \rangle}{\|\boldsymbol{\varphi}\| \|\boldsymbol{\phi}\|} \approx \frac{1}{S} \frac{\sum \varphi_i \sum \phi_i}{\sqrt{\sum \varphi_i^2 \sum \phi_i^2}} = \frac{1}{S} \sqrt{\frac{1}{\sum (\frac{\varphi_i}{\sum \varphi_i})^2} \frac{1}{\sum (\frac{\phi_i}{\sum \phi_i})^2}} = \sqrt{\frac{{}^2D_f \ {}^2D_g}{S \ S}} \quad (9)$$

where  ${}^qD$  denotes Hill's diversity index. We will call the fraction  $\frac{{}^2D_f}{S}$  the *broadness* of the function  $f$ , which is maximal (and equal to one) if all species contribute equally to the function (i.e. total biomass).

We can modify the above theory to account for an additional piece of species-level information in the form of a biomass scaling of species-level non-additivity. It is indeed reasonable that more abundant species will, in absolute terms, show a larger response to stressor exposure. For some scaling exponent  $\alpha \geq 0$ , if we denote  $D$  the diagonal matrix whose elements are the species biomass prior to stressor exposure, we may assume that the non additive displacement vector takes the form  $\Delta \mathbf{N} = D^\alpha \boldsymbol{\Delta}$ . We then have that

$$\Delta f = \langle D^\alpha \boldsymbol{\varphi}, \boldsymbol{\Delta} \rangle \quad (10)$$

the relevant angle to consider then becomes

$$\cos \theta_\alpha = \frac{\langle \boldsymbol{\varphi}, D^{2\alpha} \boldsymbol{\phi} \rangle}{\|D^\alpha \boldsymbol{\varphi}\| \|D^\alpha \boldsymbol{\phi}\|} \quad (11)$$

giving the fraction of rescaled vectors  $\boldsymbol{\Delta}$  that would lead to a qualitative mismatch.



## 127 **3 Results**

### 128 **3.1 Mismatches between functions**

129 As predicted by our geometrical arguments, in simulations, the proportion (over random *in silico*  
130 experiments) of mismatches between the observations of two ecosystem functions closely reflects  
131 their co-linearity, as defined by the angle between their respective directions (Eq. 2, Fig. 3E). We  
132 also confirm that this angle can be estimated using only the functions' respective broadness (Eq. 3,  
133 Fig. 3E inset). However, we see that the probability of mismatches is accurately predicted only when  
134 non-additivity is unbiased at the population level; that is when approximately half the species show  
135 synergistic responses and half antagonistic ones. On the other hand, if population-level non-additivity  
136 is biased towards antagonism or synergism, the prediction based on the angle between functions  
137 will overestimate the proportion of mismatches (Fig. 3E). This could be seen as a limitation, but  
138 it actually provides a useful link between mismatches in observations at the community level and  
139 information on population-level responses. This effect occurs because when non-additivity vectors  
140 are mostly synergistic or antagonistic, they tend to fall in the areas where positive linear functions  
141 must always observe the same non-additivity (top right and bottom left quadrants in Fig. 3D). The  
142 empirical data showing a 50% rate of mismatches between total biomass and decomposition (Box  
143 1, Fig. 2B) suggests that decomposition is typically a more narrow function than total biomass,  
144 sensitive to the biomass of a subset of the community, and that the non-additive effect of stressors at  
145 the species-level (in the ecosystem context) is largely inconsistent, with species as likely to perceive  
146 synergistic or antagonistic interactions between stressors.

### 147 **3.2 Mismatches between diversity metrics**

148 From the angle between the gradients of diversity metrics, we can still predict the probability of  
149 mismatches. Here we are comparing metrics from the family of Hill diversity, which unifies the classic  
150 notions of diversity that ecologists use (richness, Shannon index, Simpson index) into one general  
151 framework where metrics vary based on  $q$ , the hill exponent, which controls their sensitivity to  
152 common or rare species (Roswell et al., 2021). Consequently, we see that the difference in the  $q$  values  
153 between two diversity metrics correlates to the size of the angle between their gradients (Fig. 4A).  
154 Here, the consistency of population-level non-additivity has a weak effect due to the non-linearity of  
155 diversity metrics. In fact, this non-linearity of diversity metrics is capable of introducing non-additivity  
156 between stressors even if there is no non-additivity at the population-level (Fig. 4B). Furthermore,  
157 the evenness of the biomass distribution of a community determines how similar gradients of diversity  
158 metrics are to positive functions. For uneven communities, increasing the biomass of most species  
159 will increase diversity so gradients will behave similarly to positive linear functions. However, for  
160 perfectly even communities, increasing the biomass of any single species will decrease diversity so  
161 gradients of diversity will effectively be negative functions of biomass.

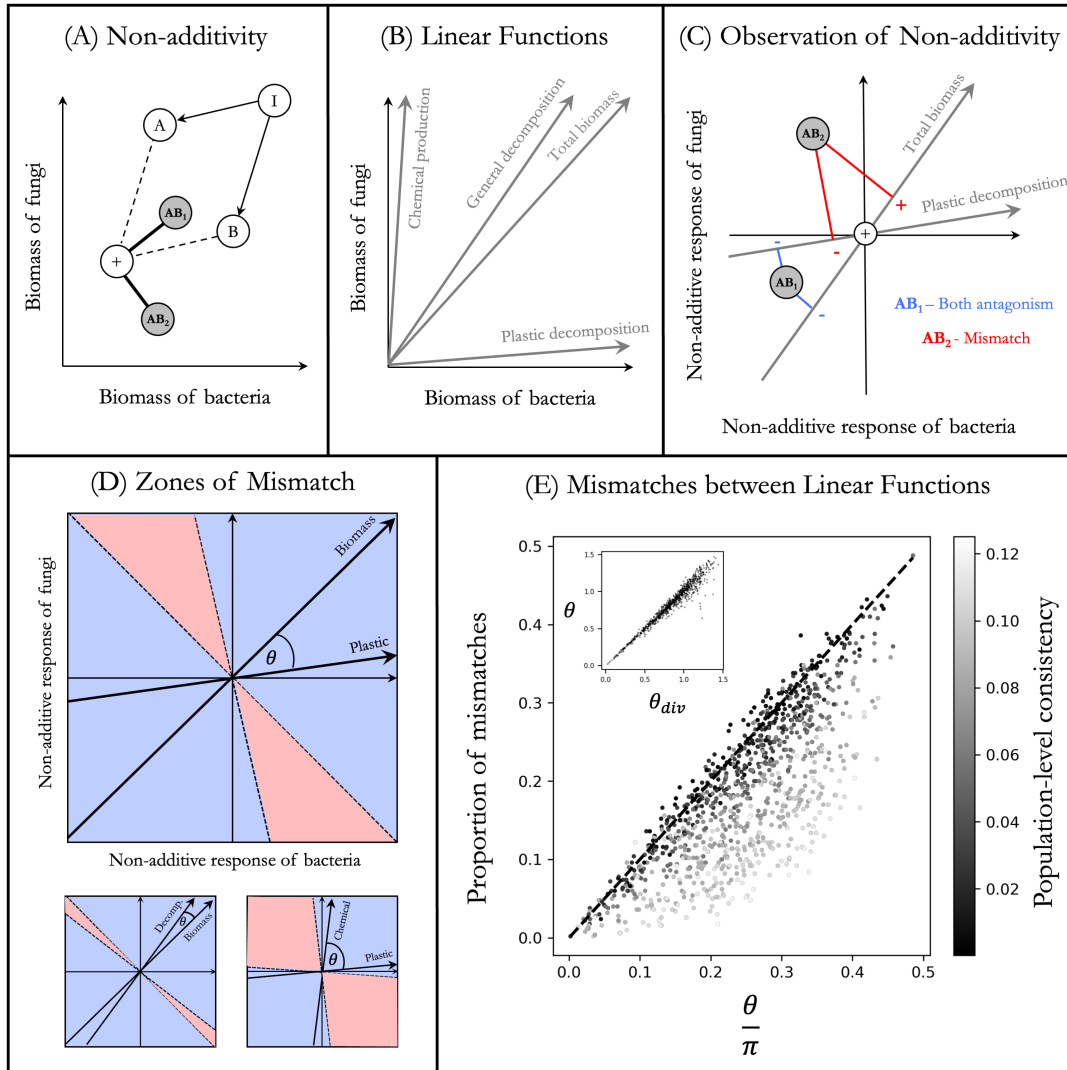

Figure 3: **(A)** Stressors and their non-additive interactions can be viewed as displacement vectors in community state-space. Here a community of bacteria and fungi is impacted by two stressors, represented by the black arrows from the initial state of the community ( $I$ ) to the points  $A$  and  $B$ . The predicted state following exposure to both stressors ( $+$ ) is based on an additive null model. The points  $AB_1$  and  $AB_2$  are two examples of realised states following exposure to both stressors. The thick black lines between the predicted and realised states therefore represent examples of non-additive effects. **(B)** Measures of ecosystem function can be represented as positive directions in this state-space. **(C)** Realised states are plotted in state space where the additive expectation is at origin and each axis describes the non-additive effect on each species. Here the non-additive vectors associated with the realised states  $AB_1$  and  $AB_2$  from **(A)** are projected onto total biomass and plastic decomposition. For  $AB_1$ , both community metrics observe antagonism. However, for  $AB_2$  there is a mismatch in the observations of non-additivity: total biomass observes synergism while plastic decomposition observes antagonism. **(D)** For two functions, the zones of mismatches in their observations can be found by drawing lines perpendicular to the functions that go through the origin. Community metrics will observe different stressor interactions for non-additive vectors that fall between these lines (i.e., in the red zones). **(E)** Over many simulated multiple-stressor experiments, the proportion of mismatches between linear functions can be predicted by the angle between them in radians ( $\theta$ ) divided by the number  $\pi$ . When non-additivity is consistent at the species-level there are less mismatches than predicted as non-additivity vectors tend to fall in the mostly positive or mostly negative areas of state-space, which happen to overlap with the zones of consistent observations for linear functions (i.e., blue zones in **(D)**). The inset shows how the angle between two functions can be predicted using their diversities.

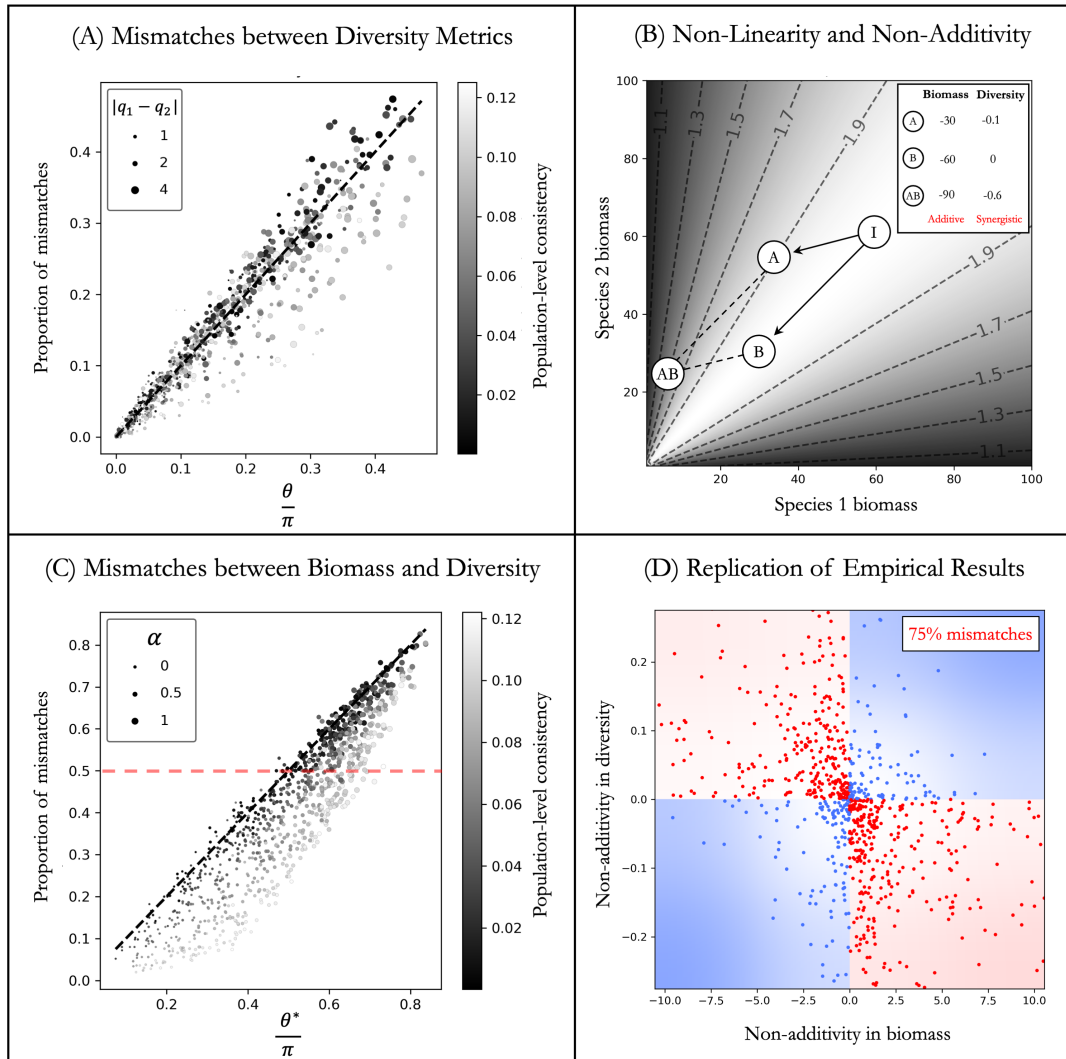

Figure 4: **(A)** The proportion of mismatches between two diversity metrics is predicted by the angle between their gradient vectors. Increasing the difference between the  $q$  values of diversity indices increases the angle between their gradients, therefore increasing the proportion of mismatches. **(B)** Heat map with contour lines depicting the Simpson's Diversity of a two-species community overlain on community state-space where each axis depicts the biomass of a single species. Other measure of diversity (e.g., Shannon index) have different spacing between their contour lines. Here the two species are being impacted by two stressors, represented by the black arrows from the initial state of the community (I) to the points A and B. There is no non-additivity at the population level (the point AB is exactly where an additive null model would have predicted). Linear functions (e.g. total biomass) will therefore observe no non-additivity. However, the non-linearity of functions such as diversity can introduce non-additivity at the community level as is the case in this example. **(C)** The angle between the direction of total biomass and the gradient of a diversity index (here  $q = 2$ ) predicts the proportion of mismatches between these two very different community metrics. Specifically, the relevant angle is between total biomass and the gradient of diversity after they have also been scaled by the biomass of each species ( $\theta^*$ ). When non-additivity is scaled by species biomass ( $\alpha > 0$ ) total biomass and diversity can effectively become opposite functions. Points above the dashed red line show cases where there is a systematic mismatch in the observations of total biomass and diversity. **(D)** The empirical results from Fig. 2A can be recreated by simulating multiple-stressor experiments where population-level non-additivity is relative to species' biomass.

### 162 3.3 Mismatches between function and diversity

163 Bringing these groups of community metrics together, the angle between a positive function and  
164 the gradient of a diversity metric can be used to predict the probability of mismatches in their  
165 observations (Fig. 4C)). Like before, consistency of non-additivity at the population level causes the  
166 prediction to overestimate the actual proportion of mismatches. However, we now see that the angle  
167 between these two community metrics can exceed 90 degrees leading to a systematic bias towards  
168 mismatches of observations. This intriguing result is connected to a second piece of population-level  
169 information: the scaling of non-additivity by species biomass (Eq. (11) in Box 2).

170 When non-additive effects are significantly larger for more abundant species ( $\alpha > 0.5$ ), function  
171 and diversity are expected to observe opposite stressor interactions (larger points are above the red  
172 line in Fig. 4C). If non-additivity causes the biomass of abundant species to decrease, total biomass  
173 will decrease but diversity will increase. If on the other hand, non-additivity causes the biomass of  
174 abundant species to increase, total biomass will increase but diversity will decrease. It is important  
175 to note, that when non-additivity is scaled by biomass, the relevant angle,  $\theta^*$ , is between the function  
176 and the gradient of diversity after they have been scaled in the same way by biomass. The empirical  
177 data (Box 1, Fig. 2A), can be easily replicated by simulating many multiple-stressor experiments  
178 and comparing how function and diversity observe stressor interactions. To recreate the empirical  
179 results (i.e., 75% mismatches), the only requirement is that non-additivity must be scaled by biomass  
180 (Fig. 4D).

## 181 4 Discussion

182 Our geometric approach has shed some light on multi-stressor interactions at the community level.  
183 Qualitative mismatches between the observations of community metrics should no longer be surprising,  
184 even metrics describing the same aspect of a community (i.e., either its functioning or diversity) can  
185 easily observe opposite interactions between the same two stressors. With our theory, mismatches  
186 between observations at the community level are predictable, and can even reveal useful information  
187 about lower-levels of biological organization. Mismatches between measures of functioning indicate  
188 their broadness (i.e., how many species contribute to the functions) while mismatches between  
189 diversity metrics indicate their sensitivity to rare or common species (i.e., hill exponent).

190 Ecological research is typically reductionist, using information about individuals and populations  
191 to understand communities and ecosystems (Loreau, 2010). Our work demonstrates the reverse  
192 approach by using information about communities to understand population-level responses. Firstly,  
193 we found that when species' responses are consistently antagonistic or synergistic the co-linearity of  
194 community-level observations will overestimate the probability of mismatches. This consistency of  
195 population-level non-additivity will be determined by the sources of non-additivity. If non-additivity  
196 is generated between the stressors themselves (Boyd & Brown, 2015; Rillig et al., 2021) – perhaps via  
197 strong chemical or physical interactions (e.g., two benign chemicals could become very toxic when

198 combined) – then all species may observe the same interaction and the probability of mismatches,  
199 even between very different community metrics, could be low. On the other hand, if non-additivity is  
200 coming from a range of sources (e.g., species interactions, invasions, extinctions) then population-level  
201 responses may be inconsistent and the co-linearity of observations will predict the probability of  
202 mismatches. Secondly, comparing observations of function and diversity can reveal whether or not  
203 there is some biomass scaling of population-level non-additivity. Indeed, if stressors (and their  
204 interactions) impact species in similar ways, it is expected that more abundant species would show  
205 larger responses in absolute terms (Arnoldi, Loreau, & Haegeman, 2019; Supp & Ernest, 2014). It is  
206 this scaling by biomass that allows function and diversity to systematically observe opposite stressor  
207 interactions. For instance, non-additivity that increases the biomass of abundant species will increase  
208 total biomass but decrease diversity. As such, the meta-analysis in Box 1 opens a window through  
209 which we can study population-level non-additivity from the top down.

210 Our research focused on multiple-stressor interactions as their direction (antagonism versus synergism)  
211 carries so much weight for researchers in that field; there is evidence of a publication bias towards  
212 synergism (Côté et al., 2016) and vote-counting of interaction types is a common, but flawed, approach  
213 for generalisation (Griffen, Belgrad, Cannizzo, Knotts, & Hancock, 2016). More broadly, the link  
214 between mismatches at the community level and population-level information is not specific to  
215 stressor interactions. Our geometric approach could have focused on single stressors rather than on  
216 the non-additive effects of multiple stressors. Mismatches between community-level observations of  
217 a single stressor would reveal the consistency of species' responses to that stressor (i.e., response  
218 diversity *sensu* Elmqvist et al. (2003)), and the relationship between species' responses and their  
219 biomass (i.e., perturbation type *sensu* Arnoldi et al. (2019)). Perhaps multi-functional approaches  
220 can be leveraged to gain insights into population-level dynamics from the top down, and in an  
221 ecosystem context, by contrast to controlled experiments where populations or even organisms are  
222 studied in isolation (Bergelson, Kreitman, Petrov, Sanchez, & Tikhonov, 2021). It is well appreciated  
223 in ecology that by reducing the complexity of an ecosystem down to a single number, community  
224 metrics can hide important information about the underlying system (Hurlbert, 1971; Tilman, 1996).  
225 We have found, however, that comparing the observations of multiple community metrics gives us an  
226 opportunity to regain some useful information about population-level dynamics.

## 227 **4.1 Recommendations for empiricists**

228 Returning to the highly applied field of multiple-stressor research, we have some recommendations  
229 for empiricists arising from our theory that we hope will reduce context-dependency in the field and  
230 may help to uncover generalities.

231 **(i) Recognise that stressor interactions at the community level heavily depend on the**  
232 **way we observe the system.** Since two community metrics can observe opposite interactions  
233 between the same stressors, it is unwise to think of stressor interactions at the community level  
234 as “intrinsic” to the stressors themselves. As there is growing interest in the existence of context

235 dependency of stressor interactions (Turschwell et al., 2022; King et al., 2022), development of general  
236 theory is sorely needed. Our work offers a mechanistic explanation for one of the drivers of this  
237 context dependency: observations at the community level. More broadly, our work illustrates a  
238 common form of context-dependence in ecology that is caused by methodological differences between  
239 studies (Catford, Wilson, Pyšek, Hulme, & Duncan, 2021).

240 **(ii) Do not aggregate community metrics in meta-analyses.** It is common practice for  
241 meta-analyses to aggregate the observations of different community metrics to make generalisations  
242 about multiple-stressor interactions at the community level (Jackson et al., 2016; Crain et al., 2008;  
243 Morris et al., 2022). In light of our theory, this approach does not provide useful insights. Even  
244 combining different measures of function (e.g., total biomass and decomposition) or of diversity (e.g.,  
245 richness, evenness) is not a sensible approach. Moving forward, meta-analyses should only aggregate  
246 results obtained using the exact same community metric to make generalisations about combinations  
247 of stressors or study systems.

248 **(iii) Be careful interpreting stressor interactions observed by diversity metrics.** As  
249 mentioned before, diversity metrics are highly non-linear functions of species biomass. Consequently,  
250 linear responses of species' biomass can easily be observed as non-linear responses of diversity.  
251 The non-linearity of diversity metrics can of course translate into non-additivity between stressors  
252 even if there are no direct interactions between the stressor and there are no biological sources of  
253 non-additivity (Fig. 4B). It therefore does not make sense to use an additive null model to predict  
254 multiple-stressor impacts on diversity. Furthermore, non-linear aggregate properties, such as diversity,  
255 are sensitive to dimensional effects when scaling up predictions from the species level to the community  
256 level (Orr, Piggott, Jackson, & Arnoldi, 2021).

257 **(iv) Measure and report stressor interactions at the community level using multiple ob-**  
258 **servations.** When studying multiple-stressor impacts at the community level, we suggest measuring  
259 and reporting multiple complementary observations describing both the diversity and functioning  
260 of the community. It is only by comparing multiple observations that we can study the biological  
261 mechanisms of stressor interactions at the community level. The interactions observed by each  
262 observation, and the probability of their mismatches (revealing the consistency and biomass scaling  
263 of population-level non-additivity), will give insights into potential mechanisms of non-additivity  
264 such as species interactions, extinctions and invasions.

## 265 4.2 Conclusions

266 Our work offers a platform from which to study stressor interactions at the community-level, explaining  
267 why qualitative mismatches are to be expected, but also revealing what can be learned from those  
268 mismatches about underlying population-level processes. Given the overwhelming context-dependency  
269 of multiple-stressor research, basic theoretical developments, such as our geometric approach, have  
270 potential to add clarity and direction to the field. The fact that our very simple theory could provide

271 useful insights demonstrates that there is still much to learn about stressor interactions at the  
272 community level. Building on our work, a promising approach would be to use the rich theoretical  
273 frameworks developed in community ecology to build general expectations for the ecological impacts  
274 of multiple stressors.

## 275 Acknowledgements

276 JAO and MCJ were supported by a Natural Environment Research Council grant (NE/V001396/1).  
277 JAO was supported by an Irish Research Council Laureate Award (IRCLA/2017/112) and TCD  
278 Provost's PhD Award held by JJP. JFA and ALJ were supported by an Irish Research Council  
279 Laureate Award (IRCLA/2017/186). JFA was supported by the TULIP Laboratory of Excellence  
280 (ANR-10-LABX-41).

## 281 References

- 282 Arnoldi, J.-F., Loreau, M., & Haegeman, B. (2019). The inherent multidimensionality of temporal  
283 variability: how common and rare species shape stability patterns. *Ecology Letters*, *22*(10),  
284 1557–1567.
- 285 Beauchesne, D., Cazelles, K., Archambault, P., Dee, L., & Gravel, D. (2021). On the sensitivity of  
286 food webs to multiple stressors. *Ecology Letters*.
- 287 Bergelson, J., Kreitman, M., Petrov, D. A., Sanchez, A., & Tikhonov, M. (2021). Functional biology  
288 in its natural context: A search for emergent simplicity. *Elife*, *10*, e67646.
- 289 Boyd, P. W., & Brown, C. J. (2015). Modes of interactions between environmental drivers and  
290 marine biota. *Frontiers in Marine Science*, *2*, 9.
- 291 Catford, J. A., Wilson, J. R., Pyšek, P., Hulme, P. E., & Duncan, R. P. (2021). Addressing context  
292 dependence in ecology. *Trends in Ecology & Evolution*.
- 293 Côté, I. M., Darling, E. S., & Brown, C. J. (2016). Interactions among ecosystem stressors and their  
294 importance in conservation. *Proceedings of the Royal Society B: Biological Sciences*, *283*(1824),  
295 20152592.
- 296 Crain, C. M., Kroeker, K., & Halpern, B. S. (2008). Interactive and cumulative effects of multiple  
297 human stressors in marine systems. *Ecology Letters*, *11*(12), 1304–1315.
- 298 Darling, E. S., & Côté, I. M. (2008). Quantifying the evidence for ecological synergies. *Ecology*  
299 *letters*, *11*(12), 1278–1286.
- 300 De Laender, F. (2018). Community-and ecosystem-level effects of multiple environmental change  
301 drivers: Beyond null model testing. *Global Change Biology*, *24*(11), 5021–5030.
- 302 Didham, R. K., Tylianakis, J. M., Gemmill, N. J., Rand, T. A., & Ewers, R. M. (2007). Interactive  
303 effects of habitat modification and species invasion on native species decline. *Trends in Ecology*  
304 *& Evolution*, *22*(9), 489–496.

- 305 Elmqvist, T., Folke, C., Nyström, M., Peterson, G., Bengtsson, J., Walker, B., & Norberg, J. (2003).  
306 Response diversity, ecosystem change, and resilience. *Frontiers in Ecology and the Environment*,  
307 *1*(9), 488–494.
- 308 Griffen, B. D., Belgrad, B. A., Cannizzo, Z. J., Knotts, E. R., & Hancock, E. R. (2016). Rethinking  
309 our approach to multiple stressor studies in marine environments. *Marine Ecology Progress*  
310 *Series*, *543*, 273–281.
- 311 Hedges, L. V. (1981). Distribution theory for glass’s estimator of effect size and related estimators.  
312 *Journal of Educational Statistics*, *6*(2), 107–128.
- 313 Hill, M. O. (1973). Diversity and evenness: a unifying notation and its consequences. *Ecology*, *54*(2),  
314 427–432.
- 315 Hurlbert, S. H. (1971). The nonconcept of species diversity: a critique and alternative parameters.  
316 *Ecology*, *52*(4), 577–586.
- 317 Jackson, M. C., Loewen, C. J., Vinebrooke, R. D., & Chimimba, C. T. (2016). Net effects of multiple  
318 stressors in freshwater ecosystems: a meta-analysis. *Global Change Biology*, *22*(1), 180–189.
- 319 King, O. C., van de Merwe, J. P., Campbell, M. D., Smith, R. A., Warne, M. S. J., & Brown,  
320 C. J. (2022). Interactions among multiple stressors vary with exposure duration and biological  
321 response. *Proceedings of the Royal Society B*, *289*(1974), 20220348.
- 322 Kroeker, K. J., Kordas, R. L., & Harley, C. D. (2017). Embracing interactions in ocean acidification  
323 research: confronting multiple stressor scenarios and context dependence. *Biology Letters*,  
324 *13*(3), 20160802.
- 325 Loreau, M. (2010). *From populations to ecosystems: Theoretical foundations for a new ecological*  
326 *synthesis (mpb-46)* (Vol. 46). Princeton University Press.
- 327 MacLennan, M. M., & Vinebrooke, R. D. (2021). Exposure order effects of consecutive stressors on  
328 communities: the role of co-tolerance. *Oikos*, *130*(12), 2111–2121.
- 329 Morris, O., Loewen, C., Woodward, G., Schaefer, R., Piggott, J., Vinebrooke, R., & Jackson, M.  
330 (2022). Asymmetry drives the cumulative impacts of multiple stressors on freshwater ecosystems  
331 under a warming climate. *Authorea Preprints*.
- 332 Orr, J. A., Piggott, J. J., Jackson, A. L., & Arnoldi, J.-F. (2021). Scaling up uncertain predictions to  
333 higher levels of organisation tends to underestimate change. *Methods in Ecology and Evolution*,  
334 *12*(8), 1521–1532.
- 335 Orr, J. A., Vinebrooke, R. D., Jackson, M. C., Kroeker, K. J., Kordas, R. L., Mantyka-Pringle, C.,  
336 ... others (2020). Towards a unified study of multiple stressors: divisions and common goals  
337 across research disciplines. *Proceedings of the Royal Society B*, *287*(1926), 20200421.
- 338 Rillig, M. C., Lehmann, A., Orr, J. A., & Waldman, W. R. (2021). Mechanisms underpinning  
339 non-additivity of global change factor effects in the plant-soil system. *New Phytologist*.
- 340 Rivett, D. W., & Bell, T. (2018). Abundance determines the functional role of bacterial phylotypes  
341 in complex communities. *Nature Microbiology*, *3*(7), 767–772.
- 342 Roswell, M., Dushoff, J., & Winfree, R. (2021). A conceptual guide to measuring species diversity.  
343 *Oikos*.



- 344 Schäfer, R. B., & Piggott, J. J. (2018). Advancing understanding and prediction in multiple stressor  
345 research through a mechanistic basis for null models. *Global Change Biology*, *24*(5), 1817–1826.
- 346 Supp, S. R., & Ernest, S. M. (2014). Species-level and community-level responses to disturbance: a  
347 cross-community analysis. *Ecology*, *95*(7), 1717–1723.
- 348 Thompson, P. L., MacLennan, M. M., & Vinebrooke, R. D. (2018). Species interactions cause  
349 non-additive effects of multiple environmental stressors on communities. *Ecosphere*, *9*(11),  
350 e02518.
- 351 Tilman, D. (1996). Biodiversity: population versus ecosystem stability. *Ecology*, *77*(2), 350–363.
- 352 Turschwell, M. P., Connolly, S. R., Schäfer, R. B., De Laender, F., Campbell, M. D., Mantyka-Pringle,  
353 C., . . . others (2022). Interactive effects of multiple stressors vary with consumer interactions,  
354 stressor dynamics and magnitude. *Ecology Letters*.
- 355 Vinebrooke, R., Cottingham, K., Norberg, J., Marten Scheffer, Dodson, S., Maberly, S., & Sommer,  
356 U. (2004). Impacts of multiple stressors on biodiversity and ecosystem functioning: The role  
357 of species co-tolerance. *Oikos*, *104*(3), 451–457.
- 358 Yue, K., Fornara, D. A., Yang, W., Peng, Y., Li, Z., Wu, F., & Peng, C. (2017). Effects of three  
359 global change drivers on terrestrial c: N: P stoichiometry: a global synthesis. *Global Change  
360 Biology*, *23*(6), 2450–2463.
